# Supplementary material for: Ultrathin and lightweight organic solar cells with high flexibility
Source: PubMed Central journal article supplement — Nat Commun. 2012 Apr 3;3:770–. doi: 10.1038/ncomms1772 (PMC3337988; doi:10.1038/ncomms1772), 2012-04-03
Supplement: ncomms1772-s1.pdf [file ncomms1772-s1.pdf]

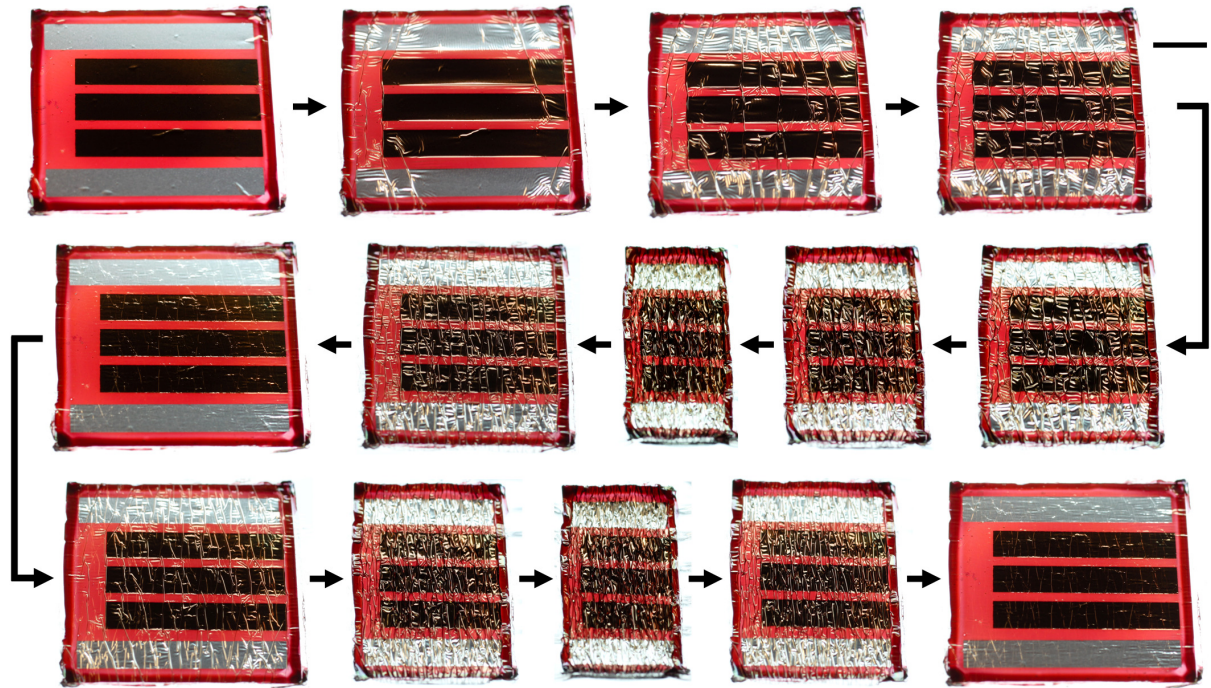

**Supplementary Figure S1 | Cyclic compression and re-stretching of an ultrathin organic solar cell.** A photographical sequence of stepwise compression and re-stretching of our ultrathin organic solar cells, illustrating the extreme mechanical resilience of the fabricated devices. The flexible device adheres very well to the pre-stretched acrylic glue VHB 4905. A gradual release of the prestrain results in the formation of fine, out-of plane wrinkles, that take up most of the mechanical strain. This concept allows the solar cell to be reversibly compressed to less than 70% of its original size, whilst remaining fully functional. Scale bar 4 mm (top right).

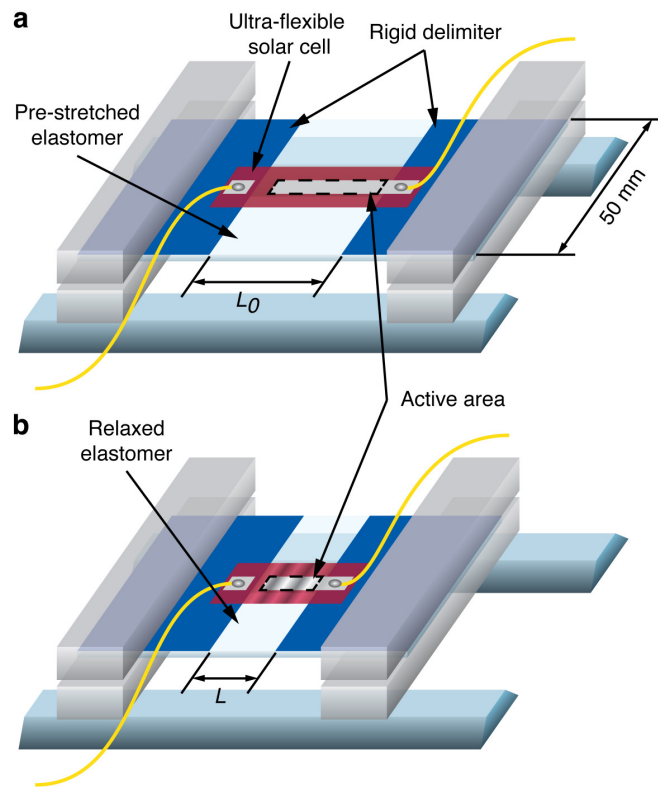

**Supplementary Figure S2 | Schematic of the compression/stretching test apparatus.** This schematic shows the basic idea and important pieces of the compression/stretching apparatus, but is not drawn to-scale. **(a)** The compression zone between the rigid delimiters (dark blue) is 1 cm long in the fully extended state ( $L_0$ ). **(b)** Upon compression, the delimiters are brought closer together where the new distance ( $L$ ) is used to determine the compression and tensile strain.

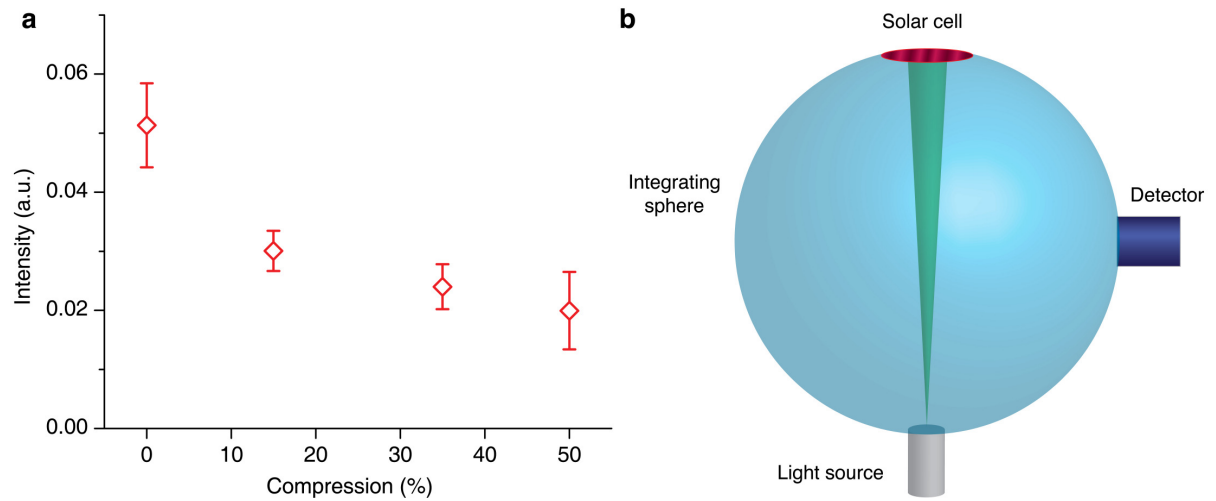

**Supplementary Figure S3 | Relative total reflectance.** (a) Relative total reflectance of an ultra-flexible solar cell both for a planar (0% compression) cell as in various stages of compression (15%, 35% and 50%). It is evident that less light is reflected in the various stages of compression. The error bars represent 8 averaged measurements to account for positional variations. (b) A schematic illustrating how an integrating sphere is used to measure the relative total reflectance. Samples are illuminated by a 532nm wavelength laser, and the relative intensity of the reflected light is measured by a Tristan light spectrometer.

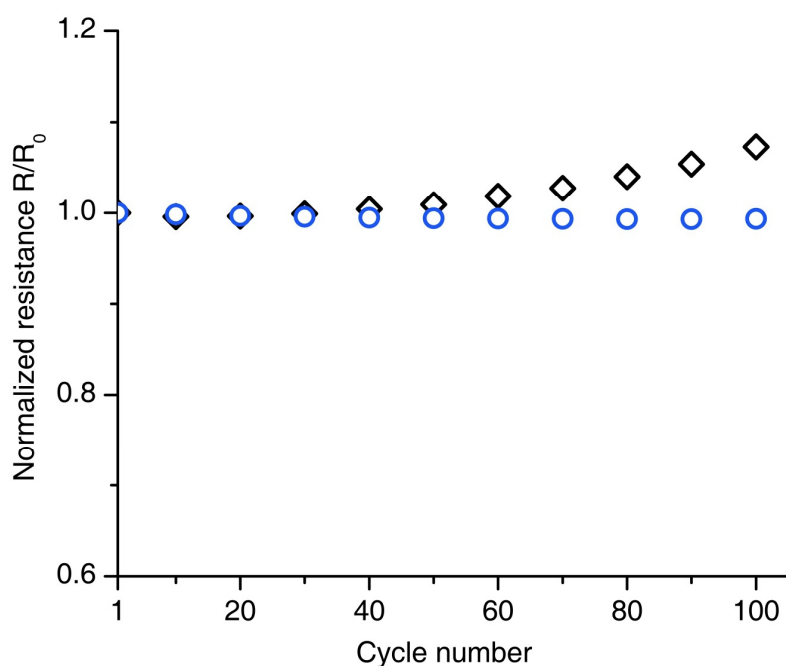

**Supplementary Figure S4 | Relative resistance upon cyclic compression and stretching.**

The normalized resistance of a Ag (black diamonds), and a PEDOT:PSS (Clevios PH 1000) (blue circles) film on 1.4  $\mu\text{m}$  PET substrate is shown as a function of the number of cycles to 50% compression. The size and shape of the conductive film was designed to be approximately the same for both, and both are roughly equivalent to a device electrode used in the solar cells. It is evident that the metal layer resistance increases by roughly 8% after 100 cycles. The resistance of the PEDOT:PSS layer shows very little (<1%) deviation over 100 cycles. A more complete analysis of these results is in progress.

|                          |                      |
|--------------------------|----------------------|
| Film thickness           | 1.4 $\mu\text{m}$    |
| RMS Surface Roughness    | 26 nm                |
| Maximum Roughness Height | 700 nm               |
| Shrinkage (150°C 30min)  | 2.1%                 |
| Dielectric Constant      | 3.25                 |
| Dielectric Strength      | 200 V/ $\mu\text{m}$ |

**Supplementary Table S1 | Physical properties of Mylar® 1.4 CW02.** Data taken from Dupont Teijin Films product information sheet
